# Supplementary material for: Metal–oxygen clusters as peroxidase mimics for their multifarious applications in colorimetric sensors
Source: Royal Society of Chemistry journal article supplement (doi:10.1039/c9nj02748c), 2019-01-01
Supplement: c9nj02748c1.pdf [file c9nj02748c1.pdf]

**Metal-oxygen cluster as peroxidase mimetics for their multifarious  
applications in colorimetric sensor**

Mei-Jie Wei<sup>a,b,†</sup>, Jia-Qi Fu<sup>a,†</sup>, Bo Li<sup>a,†</sup>, Kui-Zhan Shao<sup>a</sup>, Hong-Ying Zang<sup>a,\*</sup>, Xiao-Hong Wang<sup>a,\*</sup>

Zhong-Min Su<sup>a\*</sup>

<sup>a</sup> Key Lab of Polyoxometalate Science of Ministry of Education, Faculty of Chemistry, Northeast Normal University, Changchun, 130024, Jilin, China.

<sup>b</sup> College of Chemistry and Chemical Engineering, Yancheng Institute of Technology, Yancheng 224051, Jiangsu, China.

<sup>c</sup> School of Chemistry and Environmental Engineering, Changchun University of Science and Technology, Changchun, 130022, Jilin, China.

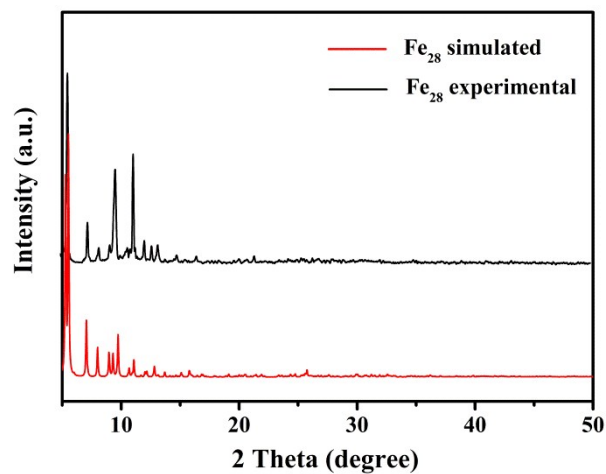

Fig. S1 XRD patterns of  $\text{Fe}_{28}$  powder samples.

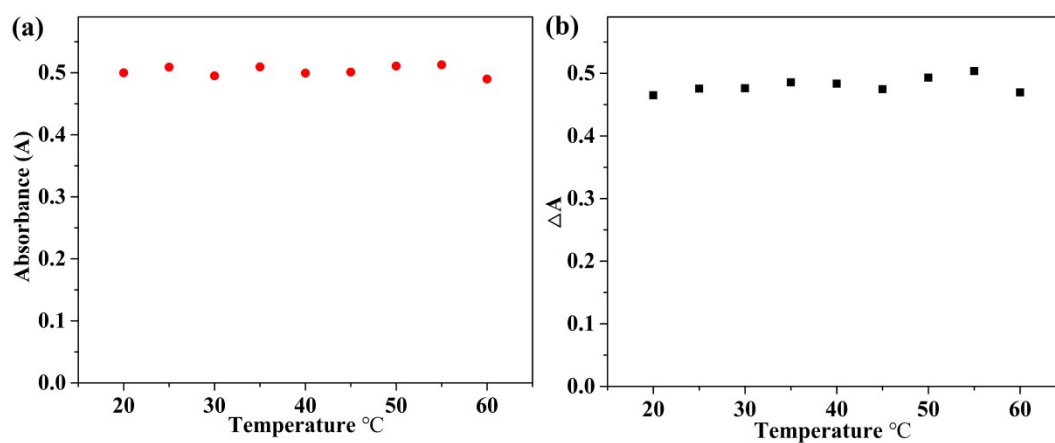

Fig. S2 (a) Temperature response curves for  $\text{H}_2\text{O}_2$  detection; (b) Temperature– $\Delta A$  curve for  $\text{H}_2\text{O}_2$  detection where  $\Delta A = A(\text{Fe}_{28}, 652 \text{ nm}) - A(\text{blank}, 652 \text{ nm})$ .

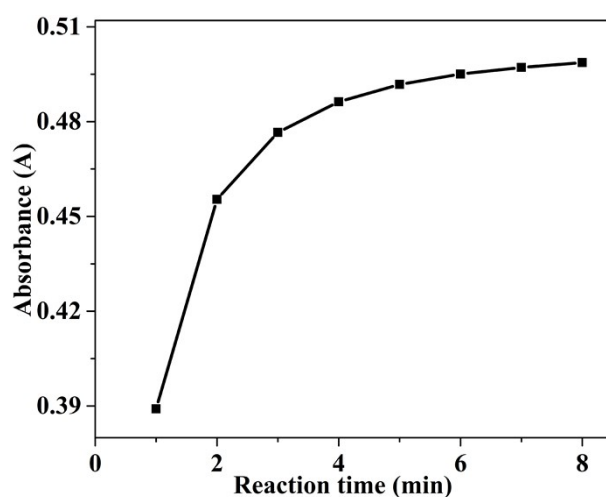

Fig. S3  $\text{Fe}_{28}$  facilitate the oxidation of TMB at ultrapure water with different reaction time.

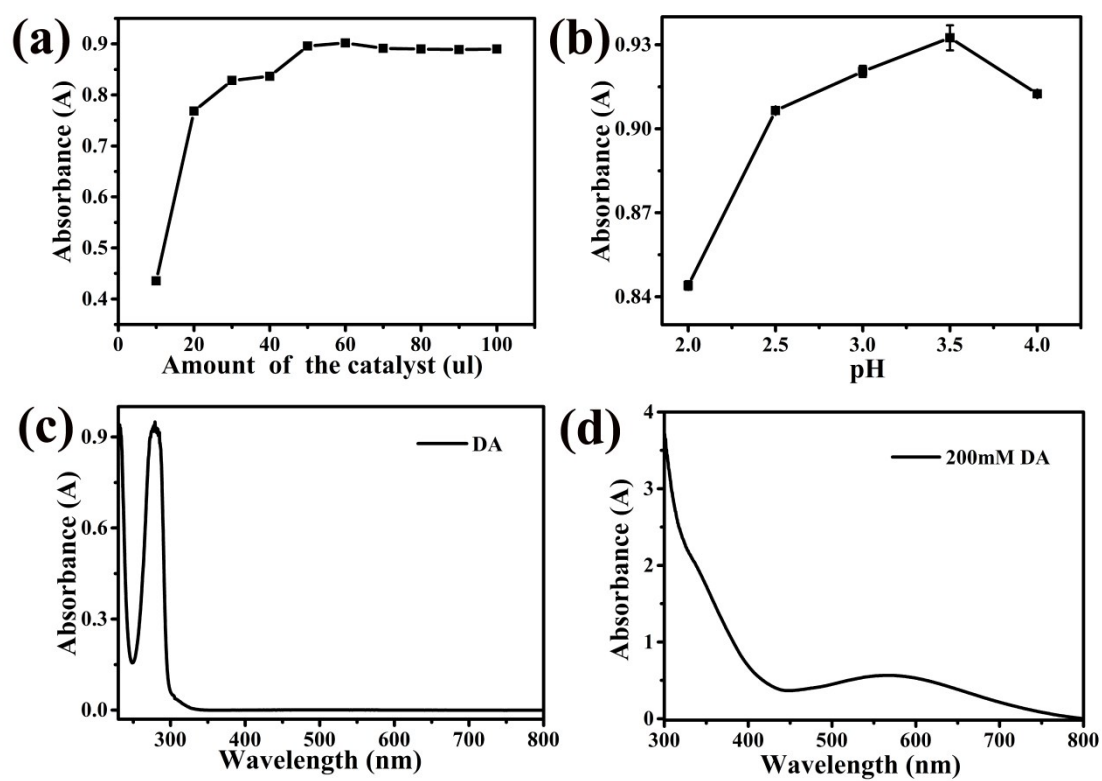

Fig. S4 (a) different amount of the catalyst facilitate the oxidation of DA at ultrapure water; (b) A pH dependent response curve for DA detection using  $\text{Fe}_{28}$  kept at 25 °C. The error bars represent the standard deviation of three measurements; (c) UV-vis absorption spectrum of the reaction solution of DA after 1 min; (d) UV-vis absorption spectrum of the reaction solution of DA with  $\text{Fe}_{28}$  after 1 min.

Table S1 The linear range for H<sub>2</sub>O<sub>2</sub> detection between Fe<sub>28</sub> and other catalysts.

| Catalyst                                                                          | Linear range ( $\mu\text{M}$ ) | References |
|-----------------------------------------------------------------------------------|--------------------------------|------------|
| Fe <sub>28</sub>                                                                  | 26.2–157                       | This work  |
| FeVO <sub>4</sub>                                                                 | 2–40                           | [1]        |
| Fe <sub>3</sub> O <sub>4</sub> MNPs                                               | 5–100                          | [2]        |
| Fe <sub>3</sub> H <sub>9</sub> (PO <sub>4</sub> ) <sub>6</sub> ·6H <sub>2</sub> O | 57.4–525.8                     | [3]        |
| CoFe-LDHs                                                                         | 1–20                           | [4]        |
| g-C <sub>3</sub> N <sub>4</sub> -Fe <sub>3</sub> O <sub>4</sub>                   | 1–40                           | [5]        |
| FA-Fe <sub>2</sub> SiW <sub>10</sub>                                              | 0.134–67                       | [6]        |

Table S2 Comparison of the kinetic parameters of Fe<sub>28</sub>, Fe<sub>3</sub>O<sub>4</sub> MNPs (magnetic nanoparticles) and HRP.

| Catalyst                            | Substance                     | $K_m$ (mM) | $V_{\max}$ (M·S <sup>-1</sup> ) |
|-------------------------------------|-------------------------------|------------|---------------------------------|
| Fe <sub>28</sub>                    | TMB                           | 0.0613     | $1.77 \times 10^{-3}$           |
| Fe <sub>28</sub>                    | H <sub>2</sub> O <sub>2</sub> | 0.0544     | $2.24 \times 10^{-3}$           |
| Fe <sub>3</sub> O <sub>4</sub> MNPs | TMB                           | 0.434      | $10.00 \times 10^{-8}$          |
| Fe <sub>3</sub> O <sub>4</sub> MNPs | H <sub>2</sub> O <sub>2</sub> | 154        | $9.78 \times 10^{-8}$           |
| HRP                                 | TMB                           | 0.275      | $1.24 \times 10^{-8}$           |
| HRP                                 | H <sub>2</sub> O <sub>2</sub> | 0.214      | $2.46 \times 10^{-8}$           |

Table S3 Comparison of catalyst activity in the linear range for glucose detection between Fe<sub>28</sub> and other catalysts.

| Catalyst                             | Linear range ( $\mu\text{M}$ ) | References |
|--------------------------------------|--------------------------------|------------|
| Fe <sub>28</sub>                     | 3.92–31.4                      | This work  |
| H <sub>2</sub> TCPP-CeO <sub>2</sub> | 50–100                         | [7]        |
| Fe <sub>3</sub> O <sub>4</sub> MNPs  | 50–100                         | [2]        |
| NiCo <sub>2</sub> O <sub>4</sub>     | 100–4500                       | [8]        |

## Reference

- [1] Y. Z. Yu, P. Ju, D. Zhang, X. X. Han, X. F. Yin, L. Zheng and C. J. Sun, Peroxidase-like activity of  $\text{FeVO}_4$  nanobelts and its analytical application for optical detection of hydrogen peroxide, *Sens. Actuators B Chem.*, 2016, **233**, 162-172.
- [2] H. Wei and E. K. Wang,  $\text{Fe}_3\text{O}_4$  magnetic nanoparticles as peroxidase mimetics and their applications in  $\text{H}_2\text{O}_2$  and glucose detection, *Anal. Chem.*, 2008, **80**, 2250-2254.
- [3] T. B. Zhang, Y. C. Lu and G. S. Luo, Synthesis of hierarchical iron hydrogen phosphate crystal as a robust peroxidase mimic for stable  $\text{H}_2\text{O}_2$  detection, *ACS Appl. Mater. Interfaces.*, 2014, **6**, 14433-14438.
- [4] Y. W. Zhang, J. Q. Tian, S. Liu, L. Wang, X. Y. Qin, W. B. Lu, G. H. Cang, Y. L. Luo, A. M. Asiri, A. O. Al-Youbi and X. P. Sun, Novel application of CoFe layered double hydroxide nanoplates for colorimetric detection of  $\text{H}_2\text{O}_2$  and glucose, *Analyst.*, 2012, **137**, 1325-1328.
- [5] J. Chen, Q. Chen, J. Y. Chen and H. D. Qiu, Magnetic carbon nitride nanocomposites as enhanced peroxidase mimetics for use in colorimetric bioassays, and their application to the determination of  $\text{H}_2\text{O}_2$  and glucose, *Microchim Acta.*, 2016, **183**, 3191-3199.
- [6] L. Q. Yang, X. Y. Liu, Q. J. Lu, N. Huang, M. L. Liu, Y. Y. Zhang and S. Z. Yao, Catalytic and peroxidase-like activity of carbon based-AuPd bimetallic nanocomposite produced using carbon dots as the reductant, *Anal. Chim. Acta.*, 2016, **930**, 23-30.
- [7] Q. Y. Liu, Y. Y. Ding, Y. T. Yang, L. Y. Zhang, L. F. Sun, P. P. Chen and C. Gao, Enhanced peroxidase-like activity of porphyrin functionalized ceria nanorods for sensitive and selective colorimetric detection of glucose, *Mater. Sci. Eng. C.*, 2016, **59**, 445-453.
- [8] W. Huang, T. Y. Lin, Y. Cao, X. Y. Lai, J. Peng and J. C. Tu, Hierarchical  $\text{NiCo}_2\text{O}_4$  hollow sphere as a peroxidase mimetic for colorimetric detection of  $\text{H}_2\text{O}_2$  and glucose, *Sensors.*, 2017, **17**, 217.
